# Supplementary material
Source: PubMed Central journal article supplement (PMC4249261)
Supplement: IAI.02320-14_zii999090981so1.pdf [file IAI.02320-14_zii999090981so1.pdf]

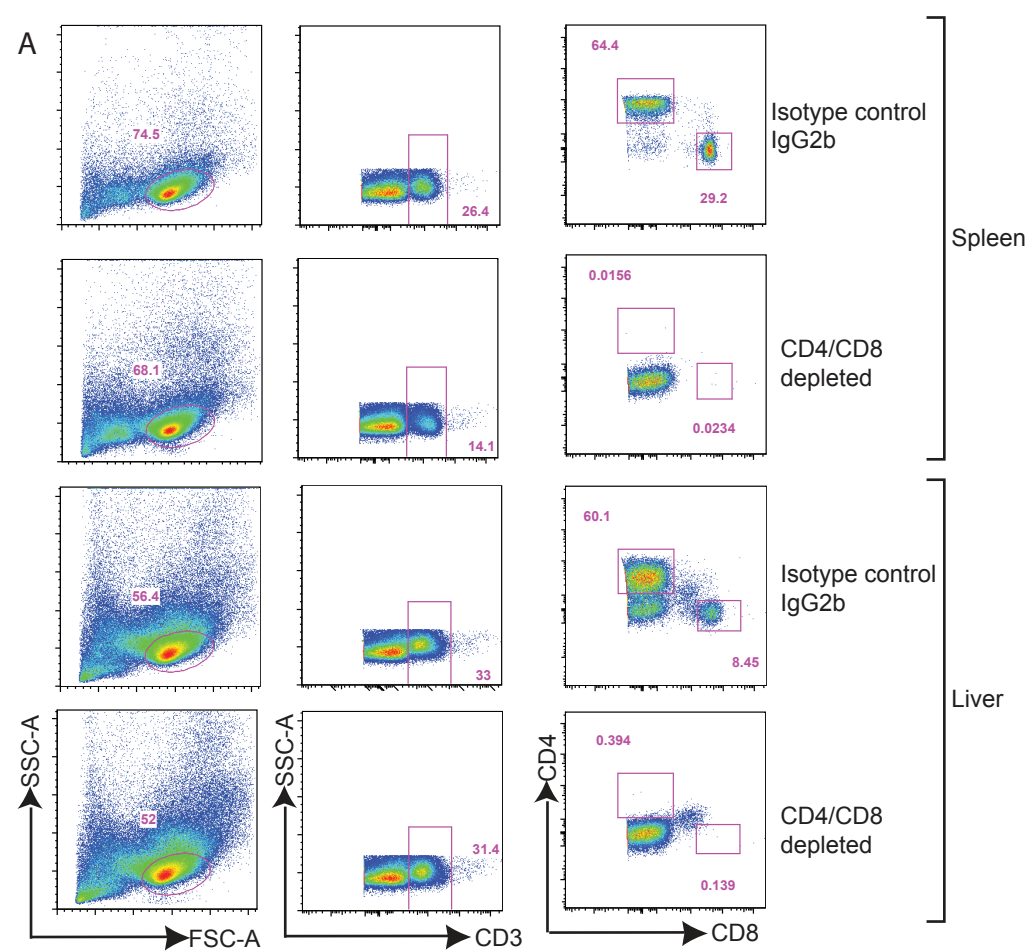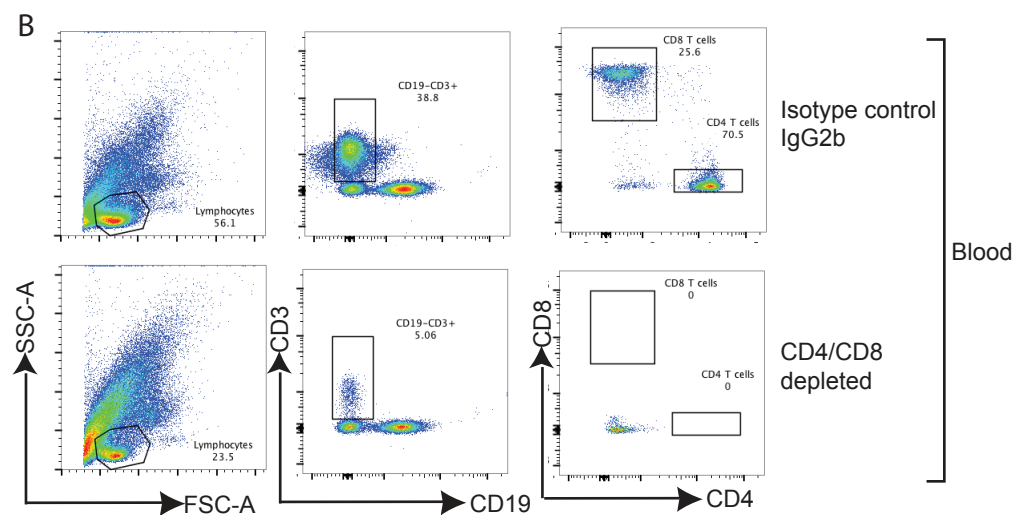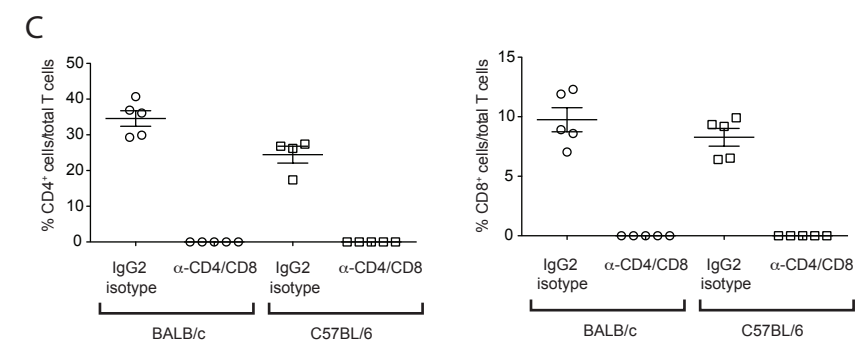

**Supplementary Figure 1.** Evaluation of the efficiency of CD4<sup>+</sup> CD8<sup>+</sup> cell depletion. **(A)** Representative plots of the percentages of CD4<sup>+</sup> and CD8<sup>+</sup> depleted from spleen and liver of *Pyfabbf*-immunized mice treated with antibodies against CD4/CD8 or isotype control 24 hours before being sacrificed. Spleenocytes and liver infiltrating cells were first gated on forward and side scattering (left panels), then gated on CD3<sup>+</sup> T cells (middle panel) and finally separated into CD4<sup>+</sup> and CD8<sup>+</sup> T cells (right panel). **(B)** Representative plots of the percentages of CD4<sup>+</sup> and CD8<sup>+</sup> depleted from blood of *Pyfabbf*-immunized mice treated with antibodies against CD4/CD8 or isotype control 24 hours before challenge. PBMCs were gated on forward and side scattering (left panels), then gated on CD3<sup>+</sup> CD19<sup>-</sup> T cells (middle panel) and finally separated into CD4<sup>+</sup> and CD8<sup>+</sup> T cells (right panel). **(C)** Quantification of CD4<sup>+</sup> (left panel) and CD8<sup>+</sup> (right panel) T cells in BALB/c and C57BL/6 mice immunized with *Pyfabbf* and treated with IgG2b isotype control or anti-CD4/CD8 antibodies. Representative data from one experiment is shown. This experiment was repeated two times.
